# Supplementary material for: Loss of function of the E3 ubiquitin-protein ligase UBE3B causes Kaufman oculocerebrofacial syndrome
Source: PubMed Central journal article supplement — J Med Genet. 2013 May 17;50(8):493–9. doi: 10.1136/jmedgenet-2012-101405 (PMC3717725; doi:10.1136/jmedgenet-2012-101405), 2013-05-17
Supplement: jmedgenet-2012-101405-s1.pdf [file jmedgenet-2012-101405-s1.pdf]

## Supplementary Material

### LOSS OF FUNCTION OF THE E3 UBIQUITIN-PROTEIN LIGASE *UBE3B* CAUSES KAUFMAN OCULOCEREBROFACIAL SYNDROME

Elisabetta Flex,<sup>1</sup> Andrea Ciolfi,<sup>1,2</sup> Viviana Caputo,<sup>3</sup> Valentina Fodale,<sup>1</sup> Chiara Leoni,<sup>4</sup> Daniela Melis,<sup>5</sup>  
Maria Francesca Bedeschi,<sup>6</sup> Laura Mazzanti,<sup>7</sup> Antonio Pizzuti,<sup>3</sup> Marco Tartaglia<sup>1,8</sup> and  
Giuseppe Zampino<sup>4,8</sup>

<sup>1</sup>Dipartimento di Ematologia, Oncologia e Medicina Molecolare, Istituto Superiore di Sanità, Rome, 00161, Italy. <sup>2</sup>Dipartimento di Medicina Molecolare, Università “La Sapienza”, Rome, 00185, Italy. <sup>3</sup>Dipartimento di Medicina Sperimentale, Università “La Sapienza”, Rome, 00185, Italy. <sup>4</sup>Istituto di Clinica Pediatrica, Università Cattolica del Sacro Cuore, Rome, 00168, Italy. <sup>5</sup>Dipartimento di Pediatria, Facoltà di Medicina e Chirurgia, Università “Federico II”, Naples, 80131, Italy. <sup>6</sup>UOD Genetica Medica, Fondazione IRCCS Ca' Granda Ospedale Maggiore Policlinico, Milan, Italy. <sup>7</sup>Dipartimento di Pediatria, Università degli Studi di Bologna, 40138 Bologna, Italy. <sup>8</sup>These authors contributed equally to this project.

**Supplementary Table 1.** Clinical presentation of patients with Kaufman oculocerebrofacial syndrome.

**Supplementary Table 2.** Clinical presentation of patients with features partially overlapping with Kaufman oculocerebrofacial syndrome screened for *UBE3B* gene mutations.

**Supplementary Table 3.** Primer pairs and annealing temperatures used to amplify the *UBE3B* coding sequence, and sizes of PCR products.

**Supplementary table 1.** Clinical presentation of patients with Kaufman oculocerebrofacial syndrome.

| Patient(s)<br><i>Reference</i>                 | UCSC-KS01<br><i>this study</i>        | UCSC-KS02<br><i>this study</i>         | 4 cases<br>(1)                  | 1 case<br>(2)          | 1 case<br>(3)          | 2 cases<br>(4)        |
|------------------------------------------------|---------------------------------------|----------------------------------------|---------------------------------|------------------------|------------------------|-----------------------|
| <i>UBE3B</i> mutation status                   | c.556C>T <sup>1</sup><br>p.Arg186stop | c.1166G>A <sup>1</sup><br>p.Trp389stop | unknown                         | unknown                | unknown                | unknown               |
| Sporadic/Familial<br>Sex                       | sporadic<br>female                    | sporadic<br>female                     | familial<br>2 female,<br>2 male | sporadic<br>female     | sporadic<br>male       | sporadic<br>female    |
| Neonatal findings                              |                                       |                                        |                                 |                        |                        |                       |
| Weight                                         | 25 <sup>th</sup> cent.                | 3 <sup>rd</sup> cent.                  | variable <sup>2</sup>           | 25 <sup>th</sup> cent. | 75 <sup>th</sup> cent. | 3 <sup>rd</sup> cent. |
| Respiratory distress                           | +                                     | +                                      | + (3/3)                         | +                      | +                      | + (2/2)               |
| Laryngeal stridor/<br>noisy breathing          | +                                     | +                                      | + (2/2)                         | n.r.                   | n.r.                   | + (1/2)               |
| Feeding difficulties                           | +                                     | +                                      | + (3/4)                         | +                      | +                      | n.r.                  |
| Growth retardation                             | +                                     | +                                      | - (3/3)                         | -                      | +                      | + (2/2)               |
| Delayed psychomotor<br>development             | +                                     | +                                      | + (4/4)                         | +                      | +                      | + (2/2)               |
| Delayed language                               | +                                     | +                                      | + (4/4)                         | n.r.                   | n.r.                   | n.r.                  |
| Seizures                                       | +                                     | +                                      | - (1/1)                         | n.r.                   | n.r.                   | n.r.                  |
| Shuffling gait                                 | +                                     | +                                      | + (3/4)                         | n.r.                   | n.r.                   | n.r.                  |
| Hypotonia                                      | +                                     | +                                      | + (2/3)                         | +                      | n.r.                   | + (2/2)               |
| Craniofacial features                          |                                       |                                        |                                 |                        |                        |                       |
| Microbrachycephaly                             | +                                     | +                                      | + (3/3)                         | +                      | +                      | + (2/2)               |
| Long face                                      | +                                     | -                                      | + (3/3)                         | -                      | +                      | + (1/2)               |
| Sparse and laterally<br>broad eyebrows         | +                                     | +                                      | + (3/3)                         | +                      | +                      | + (2/2)               |
| Upslanting palpebral<br>fissures               | +                                     | +                                      | + (3/3)                         | +                      | +                      | + (2/2)               |
| Telecanthus                                    | +                                     | +                                      | + (1/2)                         | +                      | +                      | + (2/2)               |
| Blepharophimosis                               | +                                     | +                                      | - (1/1)                         | n.r.                   | +                      | + (2/2)               |
| Ptoxis                                         | -                                     | +                                      | + (1/1)                         | +                      | n.r.                   | -                     |
| Epicanthal folds                               | +                                     | +                                      | - (3/3)                         | +                      | +                      | + (2/2)               |
| Short nose                                     | +                                     | +                                      | + (1/2)                         | n.r.                   | n.r.                   | + (1/1)               |
| Anteverted nares/<br>columella below alae nasi | +                                     | +                                      | + (1/2)                         | n.r.                   | n.r.                   | + (1/1)               |
| Long philtrum                                  | +                                     | +                                      | + (1/2)                         | +                      | +                      | + (2/2)               |
| Thin lips                                      | +                                     | -                                      | + (3/3)                         | +                      | +                      | + (2/2)               |
| Small mouth                                    | +                                     | +                                      | + (2/3)                         | n.r.                   | n.r.                   | + (1/2)               |
| Micrognathia                                   | +                                     | +                                      | + (4/4)                         | +                      | +                      | + (2/2)               |
| High, narrow palate                            | +                                     | +                                      | + (1/1)                         | +                      | +                      | + (2/2)               |
| Small/frail teeth                              | +                                     | +                                      | + (3/3)                         | +                      | -                      | + (2/2)               |
| Cup shaped ears                                | +                                     | +                                      | + (4/4)                         | +                      | +                      | + (1/2)               |
| Preauricular tags                              | +                                     | +                                      | + (4/4)                         | -                      | +                      | + (1/2)               |
| Auricular stenosis                             | +                                     | +                                      | n.r.                            | n.r.                   | n.r.                   | n.r.                  |

**Suppl. Table 1. Continued**

| Patient(s)<br><i>Reference</i> | UCSC-KS01<br><i>this study</i> | UCSC-KS02<br><i>this study</i> | 4 cases<br>(1) | 1 case<br>(2)  | 1 case<br>(3) | 2 cases<br>(4) |
|--------------------------------|--------------------------------|--------------------------------|----------------|----------------|---------------|----------------|
| Eye anomalies                  |                                |                                |                |                |               |                |
| Microcornea                    | +                              | +                              | + (3/3)        | +              | -             | + (1/2)        |
| Strabismus                     | +                              | +                              | + (3/3)        | +              | -             | + (2/2)        |
| Pale disk                      | +                              | +                              | + (3/3)        | +              | +             | - (2/2)        |
| Nystagmus                      | -                              | -                              | + (1/2)        | -              | -             | - (2/2)        |
| Myopia                         | +                              | -                              | + (3/3)        | +              | n.r.          | + (1/2)        |
| Hearing impairment             | +                              | +                              | n.r.           | n.r.           | n.r.          | n.r.           |
| Skeletal features              |                                |                                |                |                |               |                |
| Bell shaped thorax             | +                              | +                              | + (2/2)        | -              | +             | + (2/2)        |
| Long and thin fingers          | +                              | +                              | + (2/2)        | +              | +             | + (2/2)        |
| Coxa valga                     | +                              | -                              | + (2/2)        | n.r.           | n.r.          | n.r.           |
| Pes talus valgus/varus         | +                              | +                              | n.r.           | n.r.           | +             | + (1/2)        |
| Clitoromegaly                  | +                              | +                              | n.r.           | +              | +             | + (1/2)        |
| Constipation                   | +                              | +                              | n.r.           | +              | +             | + (1/2)        |
| Gastroesophageal reflux        | +                              | +                              | n.r.           | + <sup>3</sup> | n.r.          | n.r.           |
| Thin skin                      | +                              | +                              | n.r.           | n.r.           | n.r.          | n.r.           |
| Reduced cholesterol levels     | -                              | + <sup>4</sup>                 | n.r.           | n.r.           | n.r.          | n.r.           |

<sup>1</sup>Homozygous change by descent.

<sup>2</sup>3<sup>rd</sup> cent. (N=1), 10<sup>th</sup> cent. (N=1), 75<sup>th</sup> cent. (N=2).

<sup>3</sup>Pyloric spasm.

<sup>4</sup>Low total/HDL cholesterol.

n.r., not reported.

**Supplementary Table 2.** Clinical presentation of patients with features partially overlapping with Kaufman oculocerebrofacial syndrome and negative for mutations in the coding sequence of *UBE3B*.

| Patient                                        | 1    | 2 | 3 | 4 | 5 | 6    | 7    | 8    | 9    | 10   | 11   | 12   | 13 <sup>1</sup> |
|------------------------------------------------|------|---|---|---|---|------|------|------|------|------|------|------|-----------------|
| Sex                                            | m    | m | f | f | f | m    | m    | f    | m    | f    | m    | f    | f               |
| Neonatal findings                              |      |   |   |   |   |      |      |      |      |      |      |      |                 |
| Respiratory distress                           | -    | - | + | - | + | -    | -    | -    | -    | -    | n.r. | +    | +               |
| Laryngeal stridor/<br>noisy breathing          | -    | - | - | - | - | -    | -    | -    | -    | -    | n.r. | -    | -               |
| Feeding difficulties                           | -    | + | - | - | - | -    | -    | -    | -    | -    | n.r. | -    | -               |
| Growth retardation                             | +    | + | - | - | + | +    | -    | +    | n.r. | n.r. | n.r. | n.r. | +               |
| Delayed psychomotor<br>development             | -    | + | + | + | + | -    | -    | +    | -    | +    | -    | +    | +               |
| Delayed language                               | -    | + | - | + | + | -    | -    | +    | -    | +    | -    | +    | +               |
| Seizures                                       | -    | + | - | - | - | -    | -    | -    | -    | -    | -    | -    | +               |
| Shuffling gait                                 | -    | - | - | - | - | -    | -    | -    | -    | -    | -    | -    | -               |
| Hypotonia                                      | -    | + | - | + | + | -    | n.r. | +    | -    | -    | -    | -    | -               |
| Craniofacial features                          |      |   |   |   |   |      |      |      |      |      |      |      |                 |
| Microcephaly                                   | -    | + | - | - | + | -    | -    | +    | +    | -    | -    | +    | +               |
| Long face                                      | +    | - | - | + | + | -    | -    | -    | -    | -    | -    | -    | +               |
| Sparse and laterally<br>broad eyebrows         | -    | + | - | + | + | -    | -    | +    | -    | -    | -    | +    | +               |
| Upslanting palpebral<br>fissures               | -    | - | - | - | - | -    | +    | -    | -    | -    | +    | +    | +               |
| Telecanthus                                    | +    | - | + | - | - | -    | +    | -    | -    | -    | -    | -    | +               |
| Blepharophimosis                               | +    | + | + | + | + | -    | -    | +    | +    | +    | +    | +    | -               |
| Ptosis                                         | -    | + | - | - | + | -    | -    | -    | -    | -    | -    | -    | +               |
| Epicanthal folds                               | -    | + | - | + | + | -    | +    | +    | -    | -    | -    | -    | -               |
| Short nose                                     | -    | + | + | + | + | -    | -    | +    | -    | -    | -    | -    | -               |
| Anteverted nares/<br>columella below alae nasi | +    | + | - | + | + | -    | -    | +    | -    | -    | -    | +    | +               |
| Long philtrum                                  | -    | + | - | + | + | -    | -    | +    | -    | -    | -    | -    | +               |
| Thin lips                                      | -    | - | - | + | + | -    | -    | +    | -    | -    | -    | -    | +               |
| Small mouth                                    | n.r. | + | - | - | - | n.r. | -               |
| Micrognathia                                   | +    | + | - | + | - | -    | -    | +    | -    | -    | -    | -    | +               |
| High, narrow palate                            | +    | + | - | + | - | -    | -    | +    | -    | -    | -    | -    | +               |
| Small/frail teeth                              | -    | + | - | - | - | -    | -    | -    | -    | -    | -    | n.r. | -               |
| Cup shaped ears                                | +    | + | - | + | - | -    | -    | +    | +    | -    | +    | -    | -               |
| Preauricular tags                              | +    | + | - | + | - | -    | -    | +    | +    | -    | +    | -    | -               |
| Auricular stenosis                             | -    | - | - | - | - | -    | -    | -    | -    | -    | -    | -    | n.r.            |
| Hearing impairment                             | -    | + | - | - | - | -    | -    | -    | -    | -    | -    | -    | n.r.            |
| Eye anomalies                                  |      |   |   |   |   |      |      |      |      |      |      |      |                 |
| Microcornea                                    | -    | + | - | + | - | -    | +    | +    | +    | +    | +    | +    | -               |
| Strabismus                                     | -    | + | - | - | + | -    | +    | -    | -    | -    | -    | -    | +               |
| Pale disk                                      | +    | - | + | - | - | -    | n.r. | n.r. | n.r. | n.r. | n.r. | -    | +               |
| Nystagmus                                      | -    | + | - | - | - | n.r. | n.r. | +    | -    | -    | -    | -    | +               |
| Myopia                                         | n.r. | - | - | - | - | -    | n.r. | n.r. | -    | -    | -    | -    | n.r.            |

**Suppl. Table 2. Continued**

| Patient                                | 1 | 2 | 3 | 4 | 5 | 6    | 7    | 8    | 9    | 10 | 11   | 12   | 13 <sup>1</sup> |
|----------------------------------------|---|---|---|---|---|------|------|------|------|----|------|------|-----------------|
| Skeletal features                      |   |   |   |   |   |      |      |      |      |    |      |      |                 |
| Bell shaped thorax with spaced nipples | - | - | + | + | + | -    | +    | +    | -    | -  | -    | -    | n.r.            |
| Long, thin fingers                     | + | + | - | - | + | -    | +    | +    | +    | +  | -    | -    | +               |
| Coxa valga                             |   |   |   |   |   |      |      |      |      |    |      |      | +               |
| Pes talus valgus/varus                 | + | + | - | - | - | -    | n.r. | n.r. | -    | -  | n.r. | -    | n.r.            |
| Clitoromegaly                          | - |   | - | - | - |      |      | -    |      | -  |      | -    | -               |
| Constipation                           | + | + | - | - | + | -    | -    | -    | -    | -  | -    | -    | +               |
| Gastroesophageal reflux                | - | - | - | - | - | n.r. | -    | -    | n.r. | -  | -    | n.r. | n.r.            |
| Thin skin                              | - | - | - | - | - | -    | -    | -    | -    | -  | -    | -    | -               |

<sup>1</sup>Clinical description of this patient was originally reported by Briscioli et al.<sup>6</sup>

n.r., not recorded.

**Supplementary Table 3.** Primer pairs and annealing temperatures used to amplify the *UBE3B* coding sequence, and sizes of PCR products.

| Exon | Primer Sequence (5'→3') |                       | T <sub>ann</sub> (°C) | bp  |
|------|-------------------------|-----------------------|-----------------------|-----|
|      | Forward                 | Reverse               |                       |     |
| 1    | CTGCTCTTGAGCCCCTTTC     | GCTTGTAGCACCTGGAAGG   | 59                    | 365 |
| 2    | CCTTCCAGGTGCTACAAGC     | CAGGATGTGAGGGTGACAG   | 60                    | 300 |
| 3    | TGTCCTCATCTGTAGGAAGG    | ACGTAGCTACCTGGATCATG  | 59                    | 394 |
| 4    | GTCCATTCAGGTCCACTGC     | ACTAGCAACTCTCGTTGATAG | 59                    | 344 |
| 5    | GAGCAGTTGTAAAGTGAACAC   | GGATACTGCGATGCAGTCTG  | 59                    | 345 |
| 6    | GGCCTCGGATGTGGGACAC     | GGAGAGTGGAGAAGTTGCAC  | 59                    | 222 |
| 7    | GCCAGATCATACTCTAGGG     | CGAGGTAACTCTACCACTC   | 60                    | 376 |
| 8    | CTAGGAATTTGAGCACGTTGG   | GTGTCTATCACGGCCACTGG  | 60                    | 337 |
| 9    | GTGTTTGCTAGCACATCCTC    | CTGATGGCCAGGACACAATC  | 60                    | 278 |
| 10   | AGCAGCCTCCGGCATTGAC     | GGAAAGACAGTGATTTGCATC | 60                    | 358 |
| 11   | CCAGGTCCTAGCTACAGCTC    | ACAGGAGCTGTACTTCAGCC  | 60                    | 333 |
| 12   | CTGTCTGGCCTGGCTGTGC     | GCTAAGACAACTGTCTGCC   | 62                    | 341 |
| 13   | CCCACCTTCTTTTCACGCAC    | GACACTGTATTTTGGTCTCTC | 60                    | 367 |
| 14   | TCAACCTCGTTTATTGTCTAG   | GGGAATAAATGTGCACCTTC  | 58                    | 340 |
| 15   | CAGAGCGAGGGAGATCAAGG    | CGTCCTGACAGGTGCTTCAC  | 62                    | 397 |
| 16   | GAGTATGGTCATGTTCCCATC   | CAACCACCGTTTCCTTGTGC  | 60                    | 373 |
| 17   | TCTGCTTGCATCTCATCTAAC   | AAGGAGTAACAGGAACAGTTC | 58                    | 333 |
| 18   | GATGCTGGGAGAGCTTCGC     | GGAGAGGCAGAGGTCAAGTG  | 60                    | 369 |
| 19   | GGCTGACAGCAGCCAGATTC    | CAGGCAAAGTACCTAGCACTG | 60                    | 376 |
| 20   | CTGGAAATGCCGATGGCACC    | CCTGTAGCAGCTACAGCAAC  | 60                    | 365 |
| 21   | CAGCCATGGGTGTTCCAG      | GAAGCTTCAAAGGCCAGGTC  | 62                    | 382 |
| 22   | TGGTTCCCAAGCATGTGCC     | TCAACATAAGCGCAGAGAGC  | 58                    | 262 |
| 23   | GGTTCAGAAATGACTAGACTG   | GGAGCAGCTGGCTTTCTGG   | 60                    | 337 |
| 24   | CGTGCCAGCTGTCTGCATG     | GTTACTGCTTGGCCTACCG   | 60                    | 361 |
| 25   | GACAGAGCAAACACGTGCTAC   | CCCTCCTCACTTGGCTCTG   | 60                    | 324 |
| 26   | CAGGGACTGGCCAGATCC      | CTGCCTCTGGGAGCTGAAG   | 62                    | 359 |
